# Supplementary material for: Preparation of Duplex Sequencing Libraries for Archival Paraffin-Embedded Tissue Samples Using Single-Strand-Specific Nuclease P1
Source: MDPI journal article supplement (doi:10.3390/ijms23094586), 2022-04-21
Supplement: s1 [file s1]

# A. (Blood DNA)

Sample 1

Sample 2

MBN

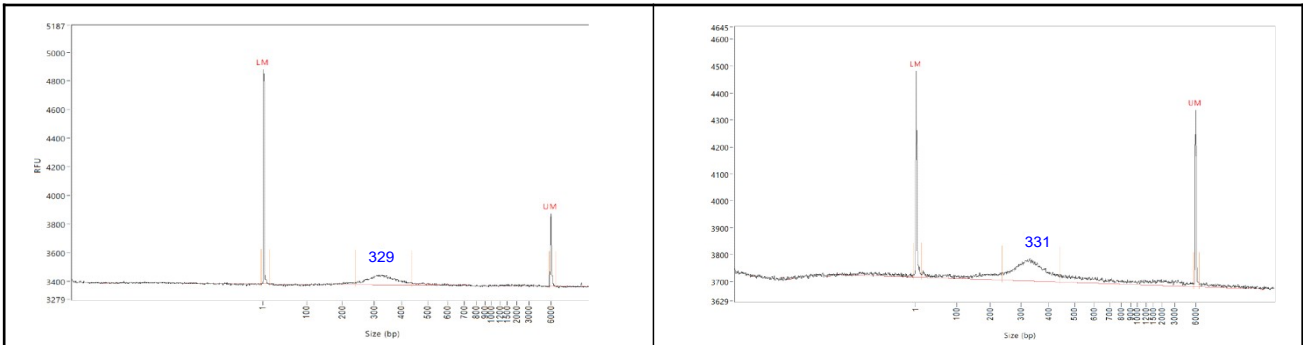

S1

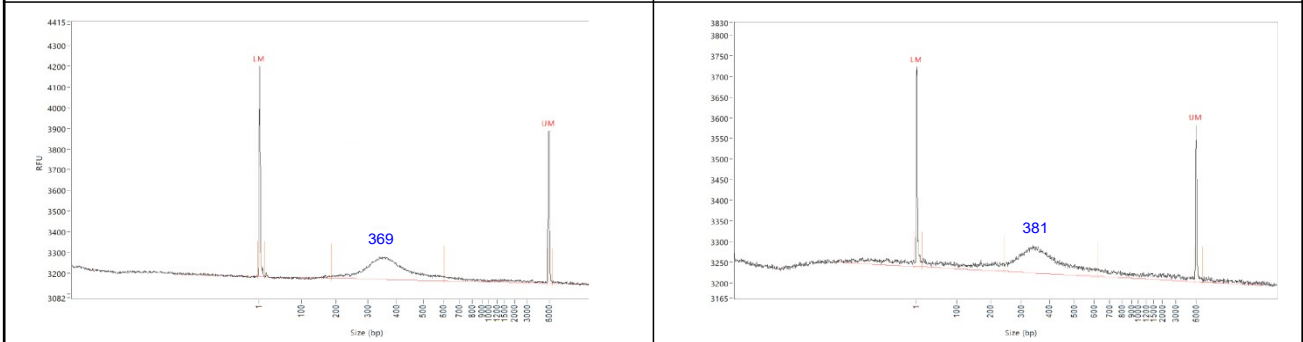

P1  
(10U)

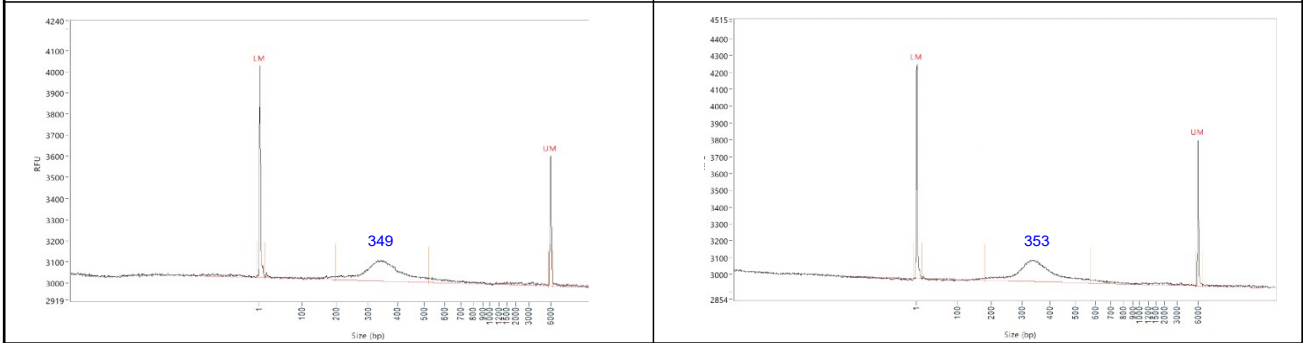

P1  
(100U)

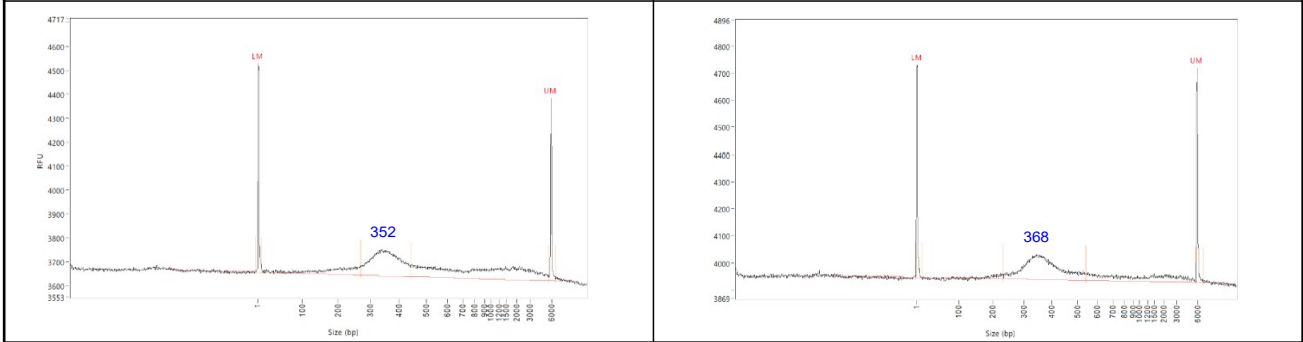

ER

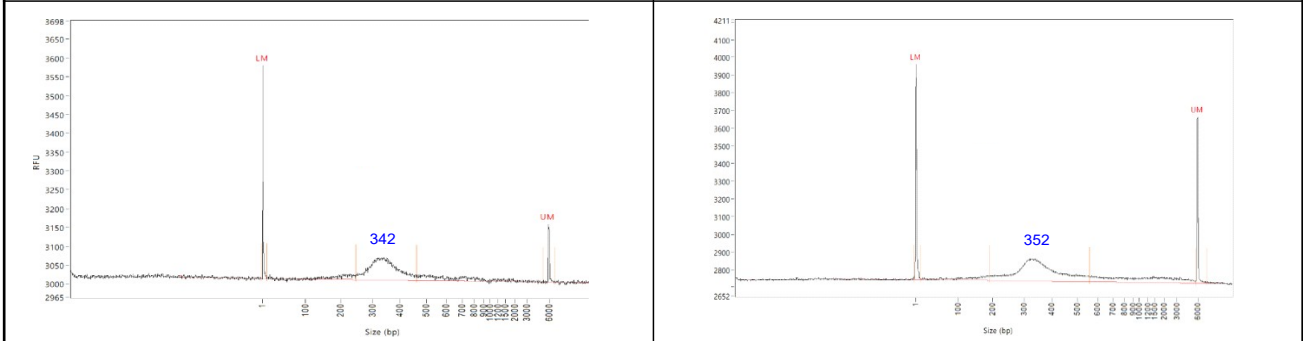

NT

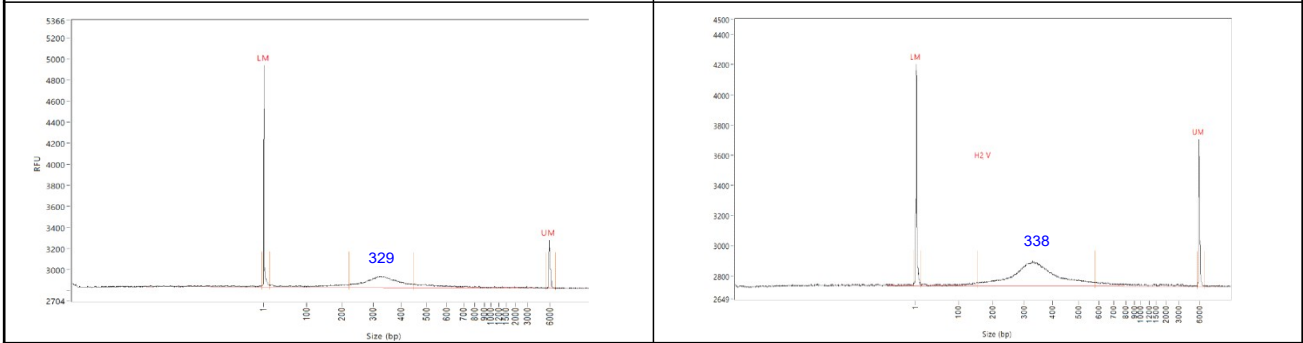

MBN

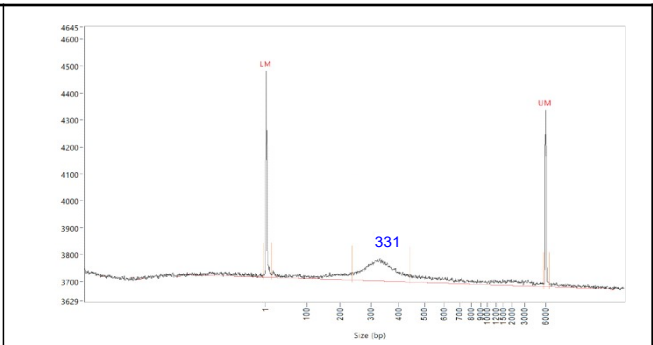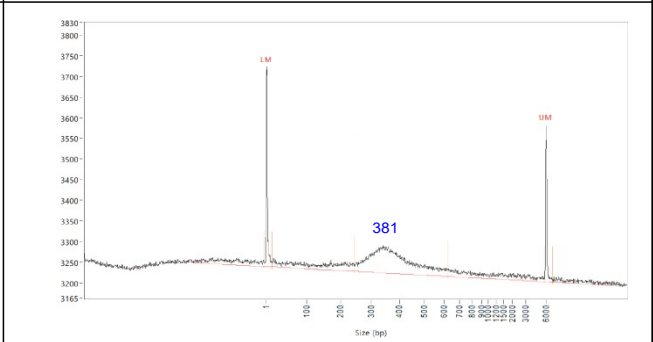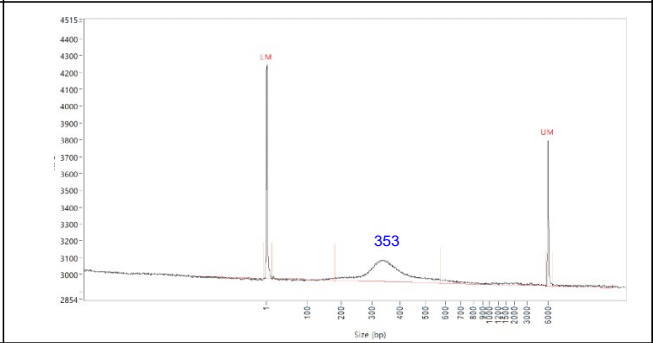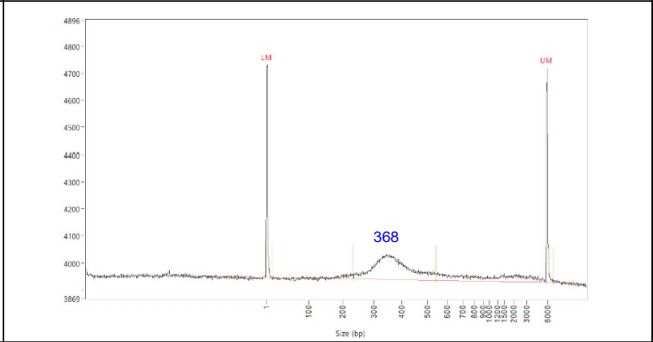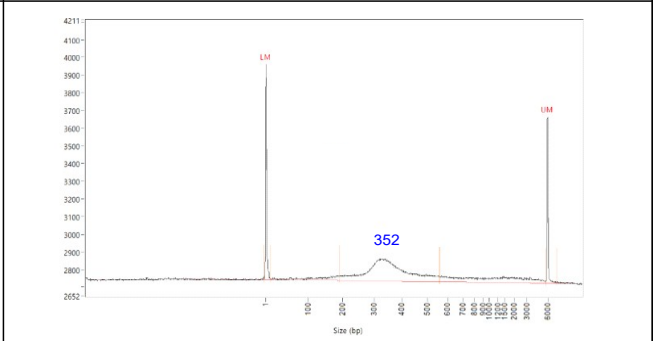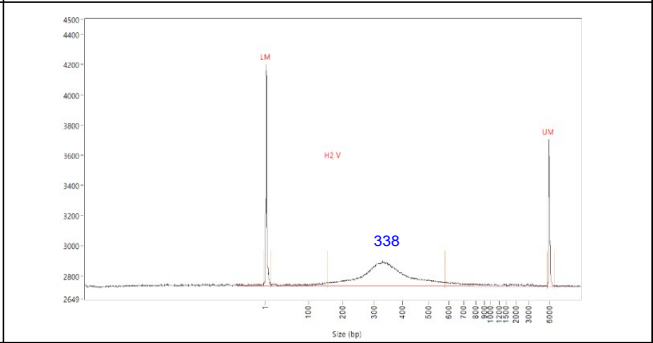

**B.** (FFPE  
DNA)

Sample 1

Sample 2

MBN

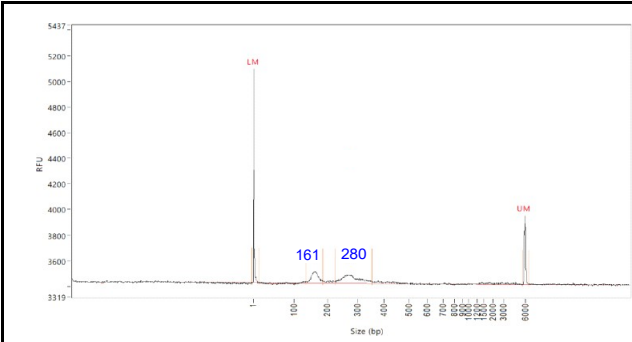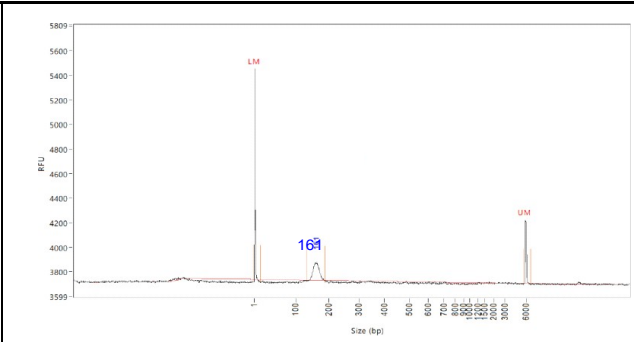

S1

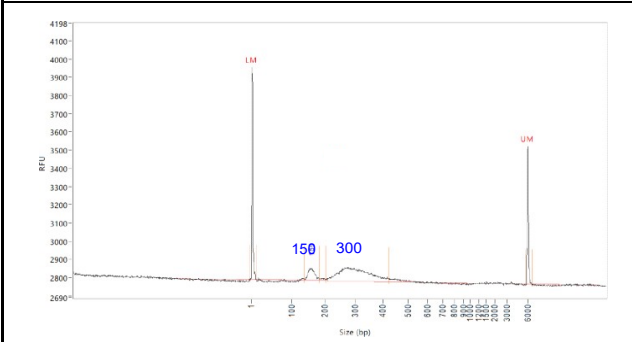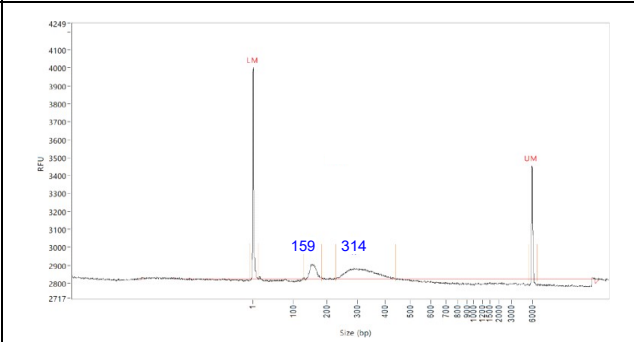

P1  
(10U)

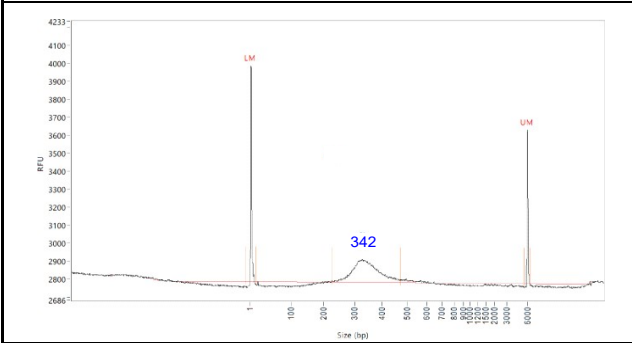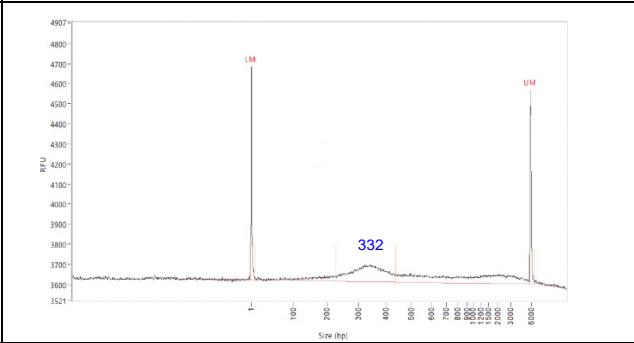

P1  
(100U)

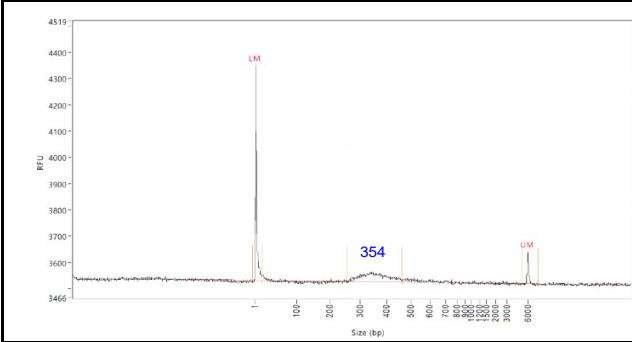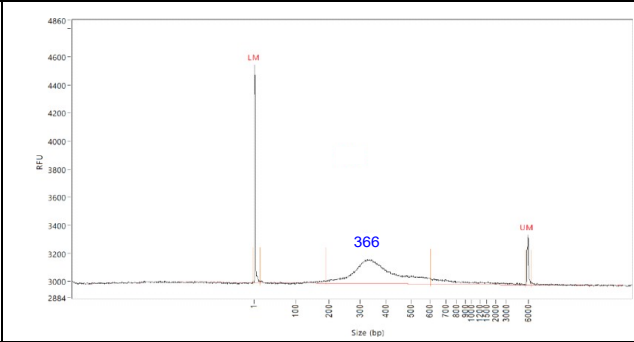

ER

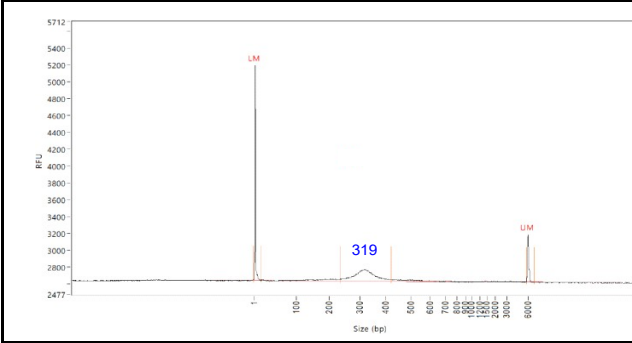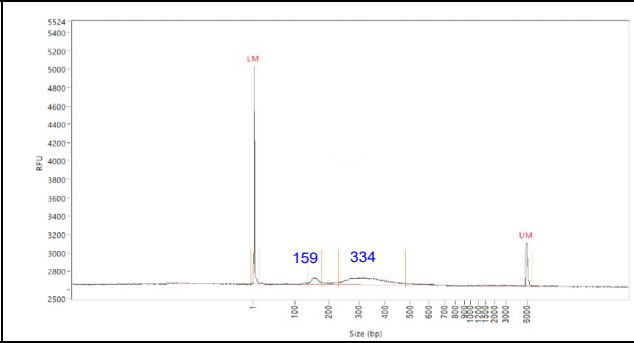

NT

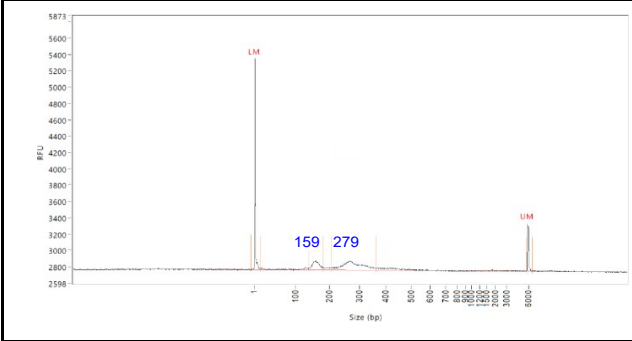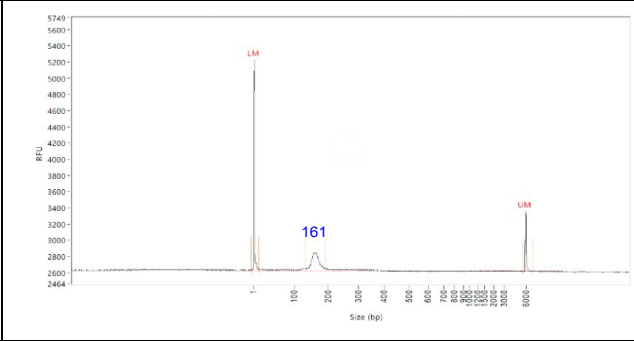

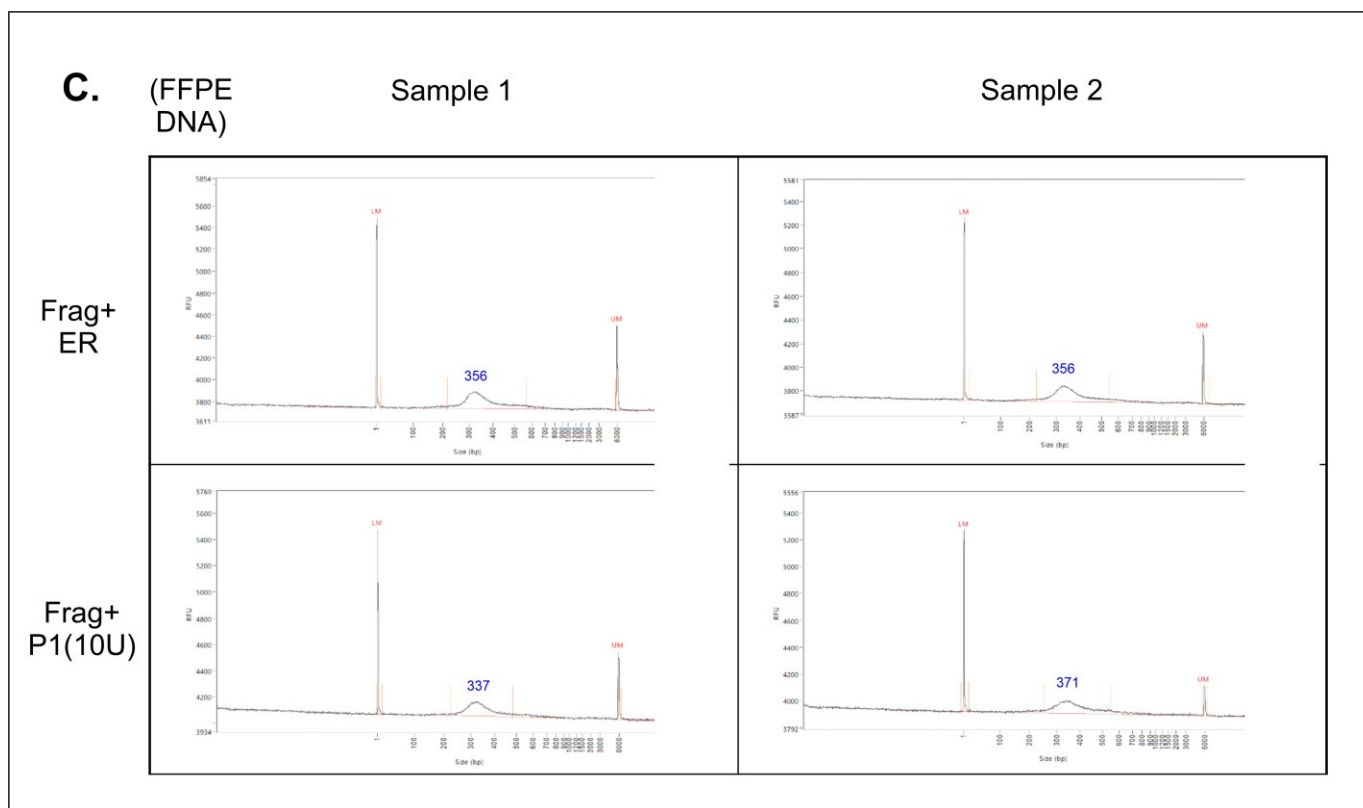

**Figure S1. Fragment analysis results.** Libraries, prepared as indicated below, were subjected to PCR amplification and their sizes were assessed using 5200 Fragment Analyzer System (Agilent Technologies, USA). **(A)** Separate aliquots of the blood DNA samples 1 and 2 were enzymatically fragmented, then the ends of the resulting DNA fragments were blunted either with one of the single-strand specific nucleases (mung bean nuclease, MBN; S1 nuclease, S1; nuclease P1, P1), or by using a standard polymerase-based approach (ER). One aliquot of each DNA sample was left untreated (NT). Adapters were ligated as described in the Materials and Methods section. **(B)** FFPE-derived DNA samples 1 and 2 were subjected directly to the standard end repair or nuclease treatment without prior fragmentation. **(C)** Two aliquots of each FFPE-derived DNA sample were subjected to enzymatic fragmentation (Frag) before proceeding with standard DNA ends repair (Frag+ER) or nuclease P1 treatment (Frag+P1(10U)). The average fragment size is shown for each library; narrow peaks with sizes of 150-161 bp represent adapter dimers.

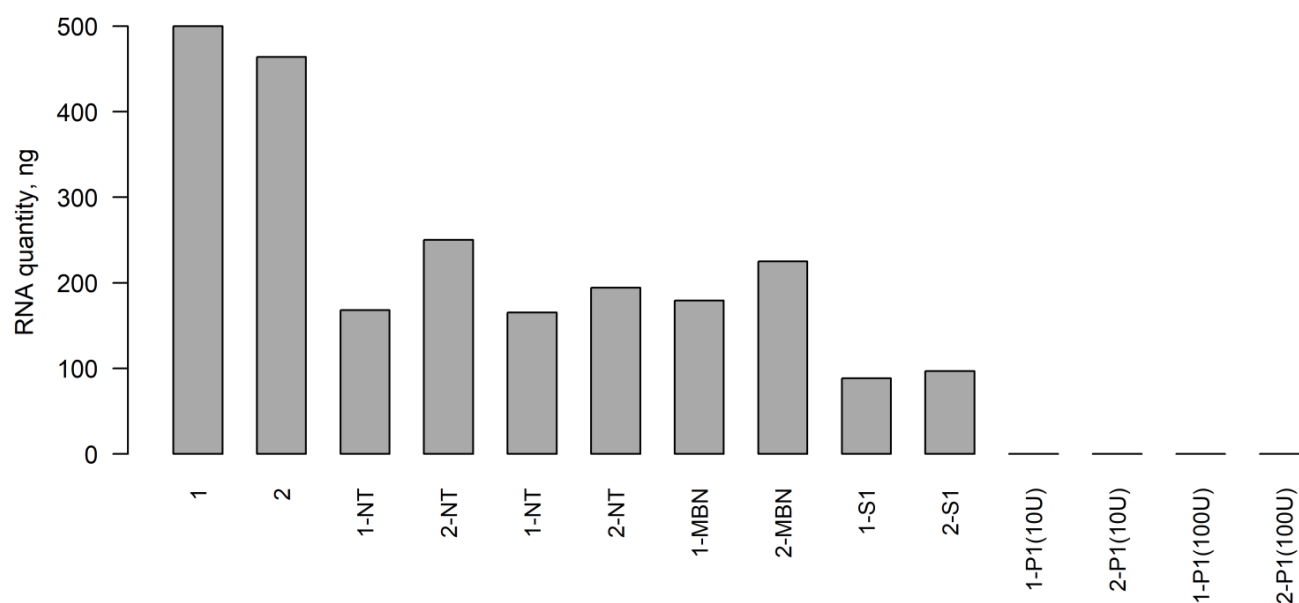

**Figure S2. Amount of RNA in DNA preparations treated with single-strand specific nucleases. 1,2 –** RNA amount in samples 1 and 2 before any treatment. Each sample aliquot contained 1000 ng of total nucleic acids (RNA+DNA). **NT** – no treatment; the decrease in RNA levels in these cases was attributed to the column purification only. One of the NT aliquots from each sample was further subjected to the standard end repair process. Other aliquots were treated with one of the following enzymes before column purification: **MBN** – mung bean nuclease; **S1** – S1 nuclease; **P1(10U)** and **P1(100U)** – two different concentrations of nuclease P1.

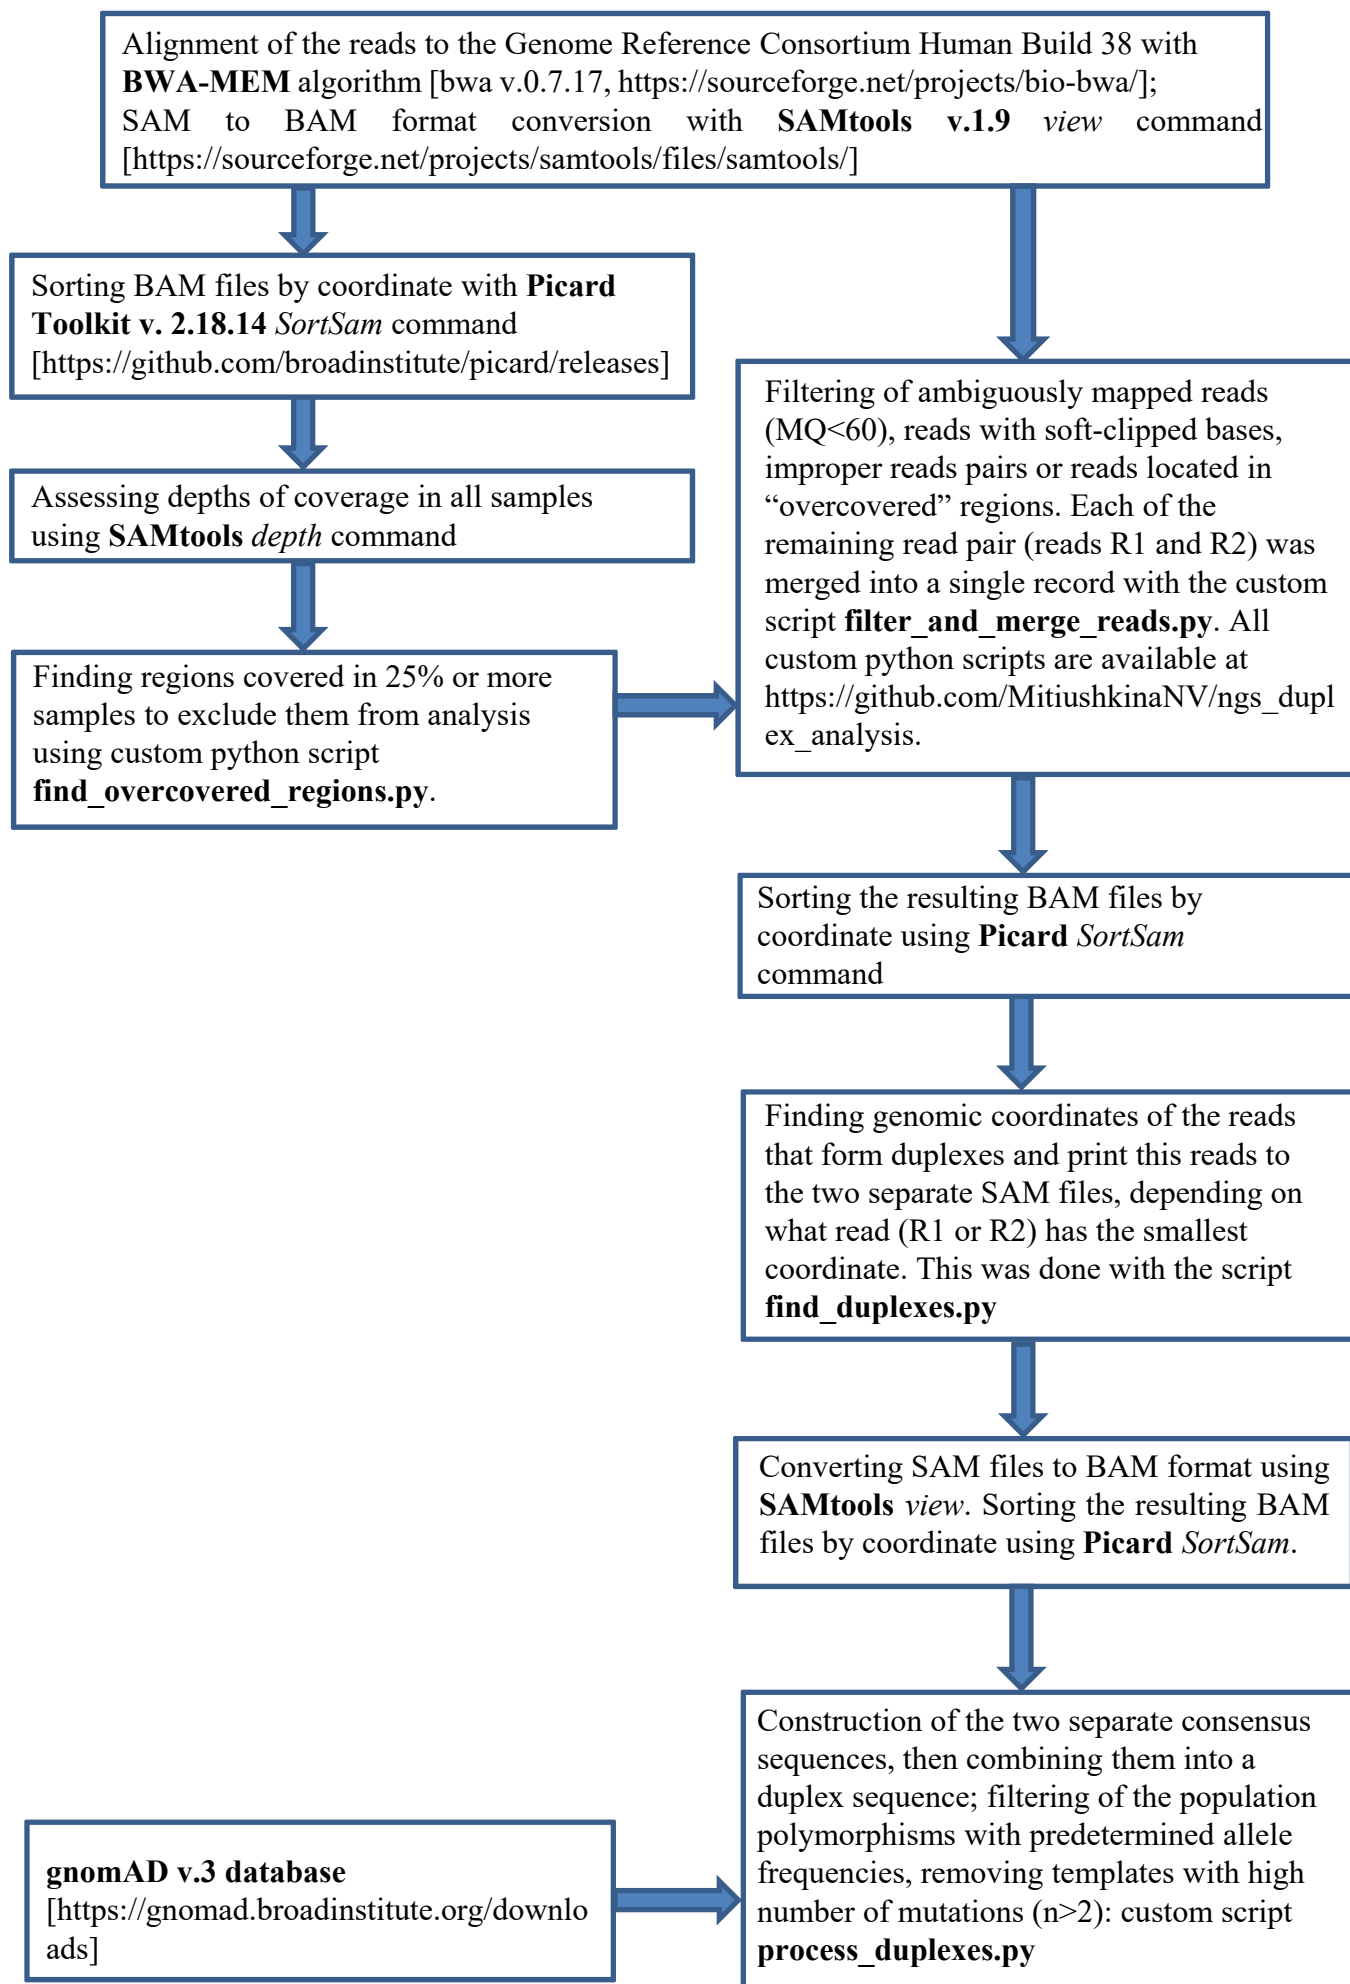

Figure S3. Bioinformatic analysis pipeline.

**Table S1. Main results of NGS analysis of 23 BotSeqS libraries.**

| Sample  | Tissue | Total number of reads | Reads passed filters | Median template length | Number of unique templates | Number of duplexes | Total length of duplex sequences | True mutations (present on both strands) | Number of templates with true mutations | SNP with population frequency >1%* | Number of errors corrected by duplex sequencing |
|---------|--------|-----------------------|----------------------|------------------------|----------------------------|--------------------|----------------------------------|------------------------------------------|-----------------------------------------|------------------------------------|-------------------------------------------------|
| MSI#1   | Tumor  | 1370414               | 1021326              | 167                    | 13907                      | 2829               | 356570                           | 39                                       | 37                                      | 345                                | 187                                             |
| MSI#2   | Tumor  | 1401604               | 847841               | 153                    | 11942                      | 3673               | 453499                           | 34                                       | 33                                      | 415                                | 109                                             |
| MSI#3   | Tumor  | 1477044               | 1156547              | 154                    | 10615                      | 1336               | 149365                           | 28                                       | 28                                      | 153                                | 92                                              |
| MSI#4   | Tumor  | 1594617               | 1186092              | 128                    | 12557                      | 2790               | 252820                           | 23                                       | 23                                      | 235                                | 99                                              |
| MUTYH#1 | Tumor  | 2290012               | 570278               | 82                     | 8732                       | 2237               | 161069                           | 4                                        | 4                                       | 142                                | 248                                             |
| MUTYH#1 | Normal | 1713073               | 592137               | 86                     | 10581                      | 2251               | 161495                           | 1                                        | 1                                       | 144                                | 290                                             |
| MUTYH#2 | Tumor  | 2045145               | 1275679              | 151                    | 16567                      | 2581               | 342119                           | 6                                        | 6                                       | 308                                | 769                                             |
| MUTYH#2 | Normal | 1781825               | 1371316              | 184                    | 19248                      | 3154               | 513681                           | 15                                       | 13                                      | 550                                | 1076                                            |
| MUTYH#3 | Tumor  | 2176616               | 1100083              | 119                    | 17508                      | 2187               | 219885                           | 7                                        | 6                                       | 197                                | 532                                             |
| POLD1#1 | Tumor  | 3288113               | 2260525              | 121                    | 26478                      | 3366               | 300776                           | 2                                        | 2                                       | 330                                | 604                                             |
| POLD1#2 | Tumor  | 2877292               | 2207696              | 111                    | 22138                      | 1809               | 200353                           | 4                                        | 4                                       | 205                                | 69                                              |
| POLE#1  | Tumor  | 2883813               | 2291505              | 144                    | 21891                      | 2871               | 426406                           | 49                                       | 47                                      | 446                                | 115                                             |
| POLE#1  | Normal | 2350023               | 1838529              | 162                    | 23300                      | 2886               | 476212                           | 11                                       | 11                                      | 476                                | 86                                              |
| WT#1    | Tumor  | 1461481               | 934129               | 165                    | 10789                      | 2056               | 284591                           | 10                                       | 8                                       | 282                                | 200                                             |
| WT#2    | Tumor  | 1143725               | 764774               | 165                    | 12239                      | 2611               | 340662                           | 11                                       | 11                                      | 345                                | 339                                             |
| WT#3    | Tumor  | 1515289               | 974796               | 159                    | 12809                      | 2808               | 346343                           | 6                                        | 6                                       | 353                                | 212                                             |
| WT#4    | Tumor  | 1832678               | 1320694              | 151                    | 12930                      | 2348               | 233688                           | 5                                        | 5                                       | 215                                | 133                                             |
| WT#5    | Tumor  | 1408914               | 960195               | 151                    | 10381                      | 2093               | 247685                           | 7                                        | 7                                       | 225                                | 113                                             |
| WT#6    | Tumor  | 1846538               | 1073902              | 176                    | 17693                      | 2484               | 389750                           | 9                                        | 8                                       | 389                                | 657                                             |
| WT#6    | Normal | 1645298               | 967883               | 163                    | 16896                      | 2806               | 454818                           | 12                                       | 11                                      | 368                                | 635                                             |
| WT#7    | Tumor  | 1595314               | 873270               | 161                    | 10372                      | 2231               | 347887                           | 9                                        | 9                                       | 348                                | 341                                             |
| WT#7    | Normal | 1571865               | 895592               | 163                    | 13848                      | 2858               | 406092                           | 8                                        | 7                                       | 391                                | 453                                             |
| HD#1    | Normal | 1366818               | 925366               | 213                    | 9393                       | 4427               | 1010109                          | 19                                       | 17                                      | 956                                | 231                                             |

\*According to the gnomAD v.3 database [<https://gnomad.broadinstitute.org/>]. SNP – single nucleotide polymorphism.
